# Supplementary material
Source: publisher figshare collection journal article supplement (https://tandf.figshare.com/ndownloader/files/13395608)
Supplement: Supplementary file 1 [file 13395608]

**Supplementary Materials**

Ceftobiprole MIC distribution

**
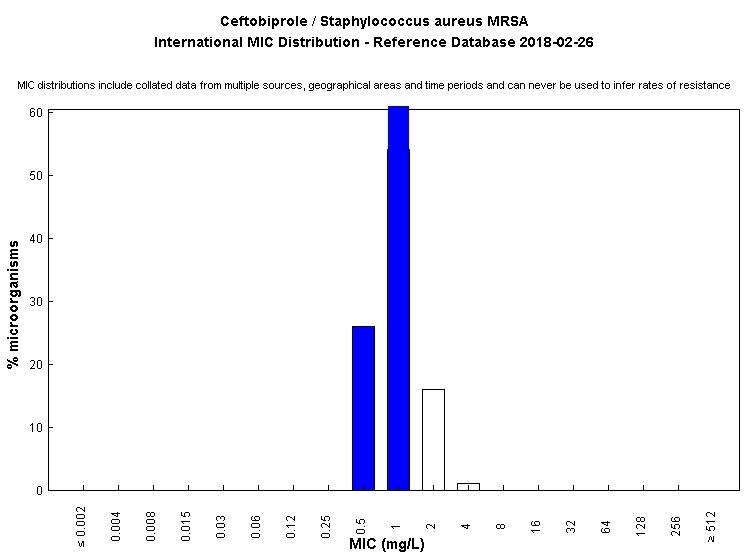
**

EUCAST database

Last access 16 Apr 2018

Caftaroline MIC distributions

Istituto Giannina Gaslini

Data set over 70 MRSA with vancomycin MIC > 1 mg/L


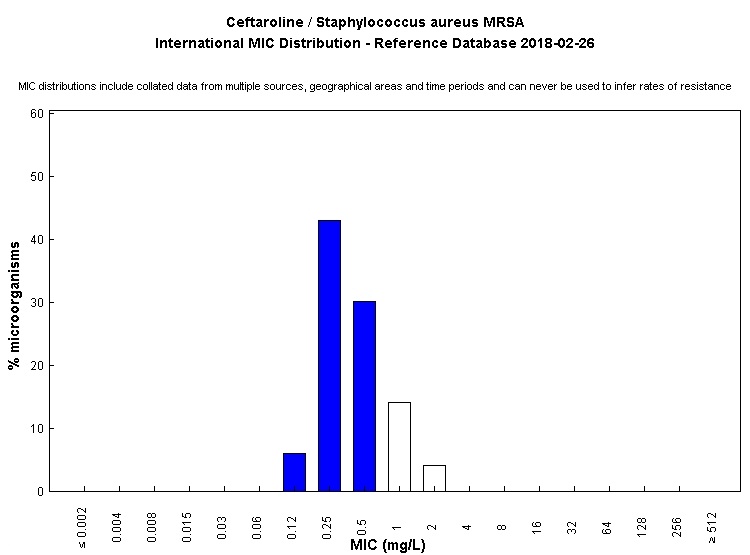


EUCAST database

Last access 16 Apr 2018
